# Supplementary material for: Fabrication of ultrathin flexible microwave shielding absorbers based on OA-γ-Fe 2 O 3 /GO synergistic superstructures
Source: Royal Society of Chemistry journal article supplement (doi:10.1039/d5mh01730k), 2025-12-24
Supplement: d5mh01730k3.pdf [file d5mh01730k3.pdf]

## ***Supplementary information***

### **Fabrication of Ultrathin Flexible Microwave Shielding Absorbers Based on OA- $\gamma$ -Fe<sub>2</sub>O<sub>3</sub>/GO Synergistic Superstructures**

Meiyan Liu<sup>1</sup>, Xiuchen Wang<sup>1,3,\*</sup>, Yajing Wang<sup>2</sup>, Bobo Shi<sup>2</sup>, Jiaxin Feng<sup>2</sup>, Zhe Liu<sup>2,3,\*</sup>

1 School of Apparel and Art Design, Xi'an Polytechnic University, Xi'an, Shaanxi 710048,  
China.

2 School of Textile Science and Engineering, Xi'an Polytechnic University, Xi'an, Shaanxi  
710048, China.

3 Key Laboratory of Functional Apparel Fabrics of Shaanxi Province, Xi'an, Shaanxi 710048,  
China.

\* Corresponding authors.

E-mail addresses : [nbwangxiuchen@163.com](mailto:nbwangxiuchen@163.com) (X. Wang), [xyliuzhe@163.com](mailto:xyliuzhe@163.com) (Z. Liu)

#### **The word file includes:**

Figs. S1 to S14

Legends for videos S1

#### **Other Supplementary Material for this manuscript includes the following:**

Videos S1

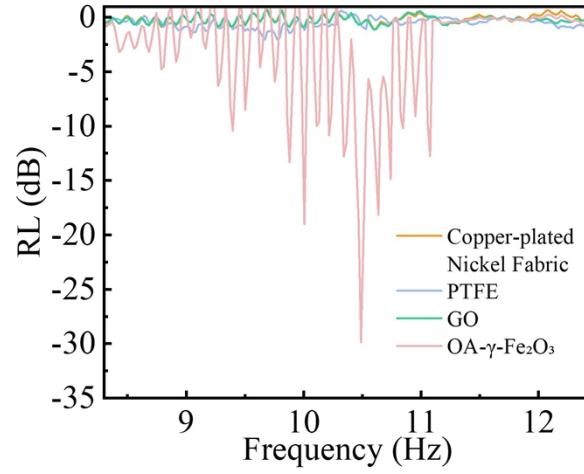

**Fig. S1. Wave Absorption Performance Control Group**

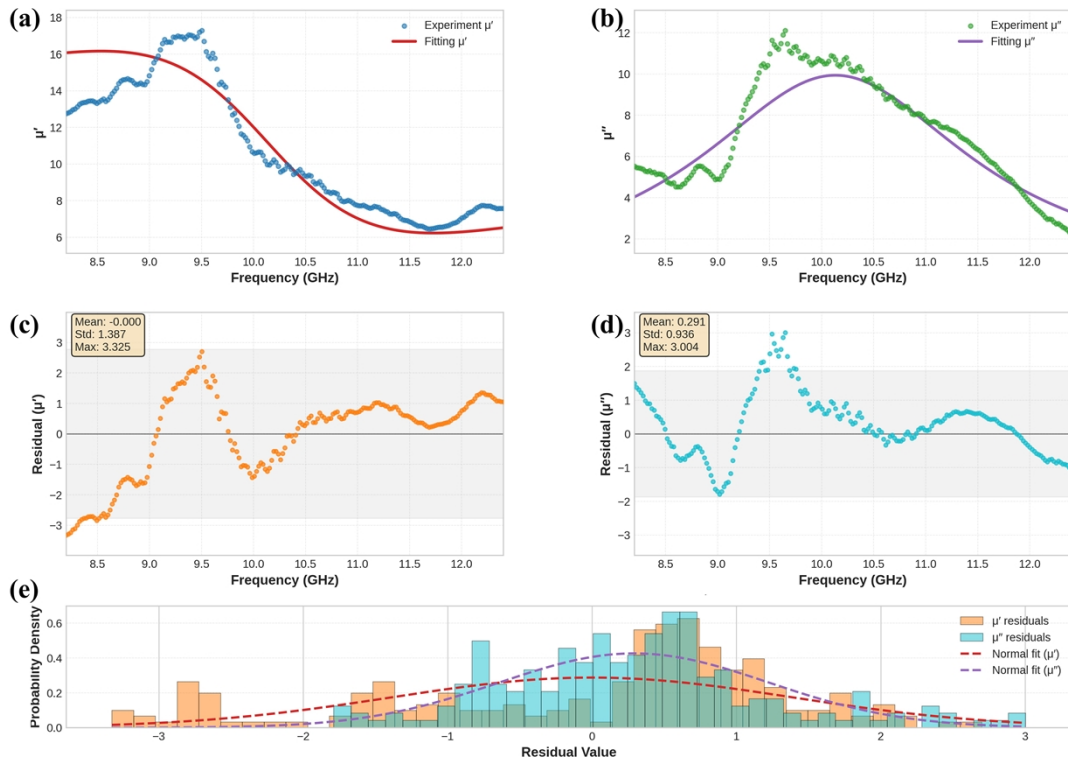

**Fig. S2. The fitted curve matches the experimental curve.(a-e)Real part of**

permeability, Imaginary part of permeability, Residuals of  $\mu'$ , Residuals of  $\mu''$ ,

Residuals distribution and normal fit

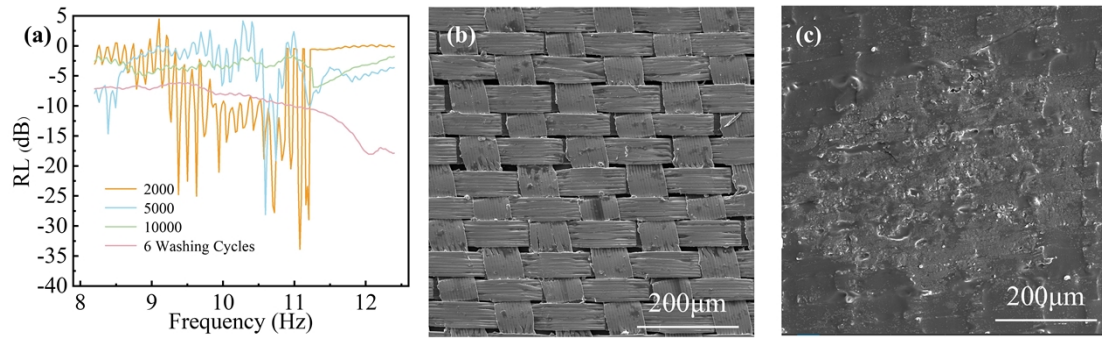

**Fig. S3. (a) RL after different bending cycles and 6 washing cycles**The fitted curve matches the experimental curve, **(b) SEM of fabric after 10,000 magnetic bends, (c) SEM of the 10,000-magnet bent metamaterial.**

#### **Video S1.**

Simulation Applications of SSP
